# Supplementary material
Source: publisher figshare collection journal article supplement (https://tandf.figshare.com/ndownloader/files/15534269)
Supplement: Supplementary file 1 [file 15534269]

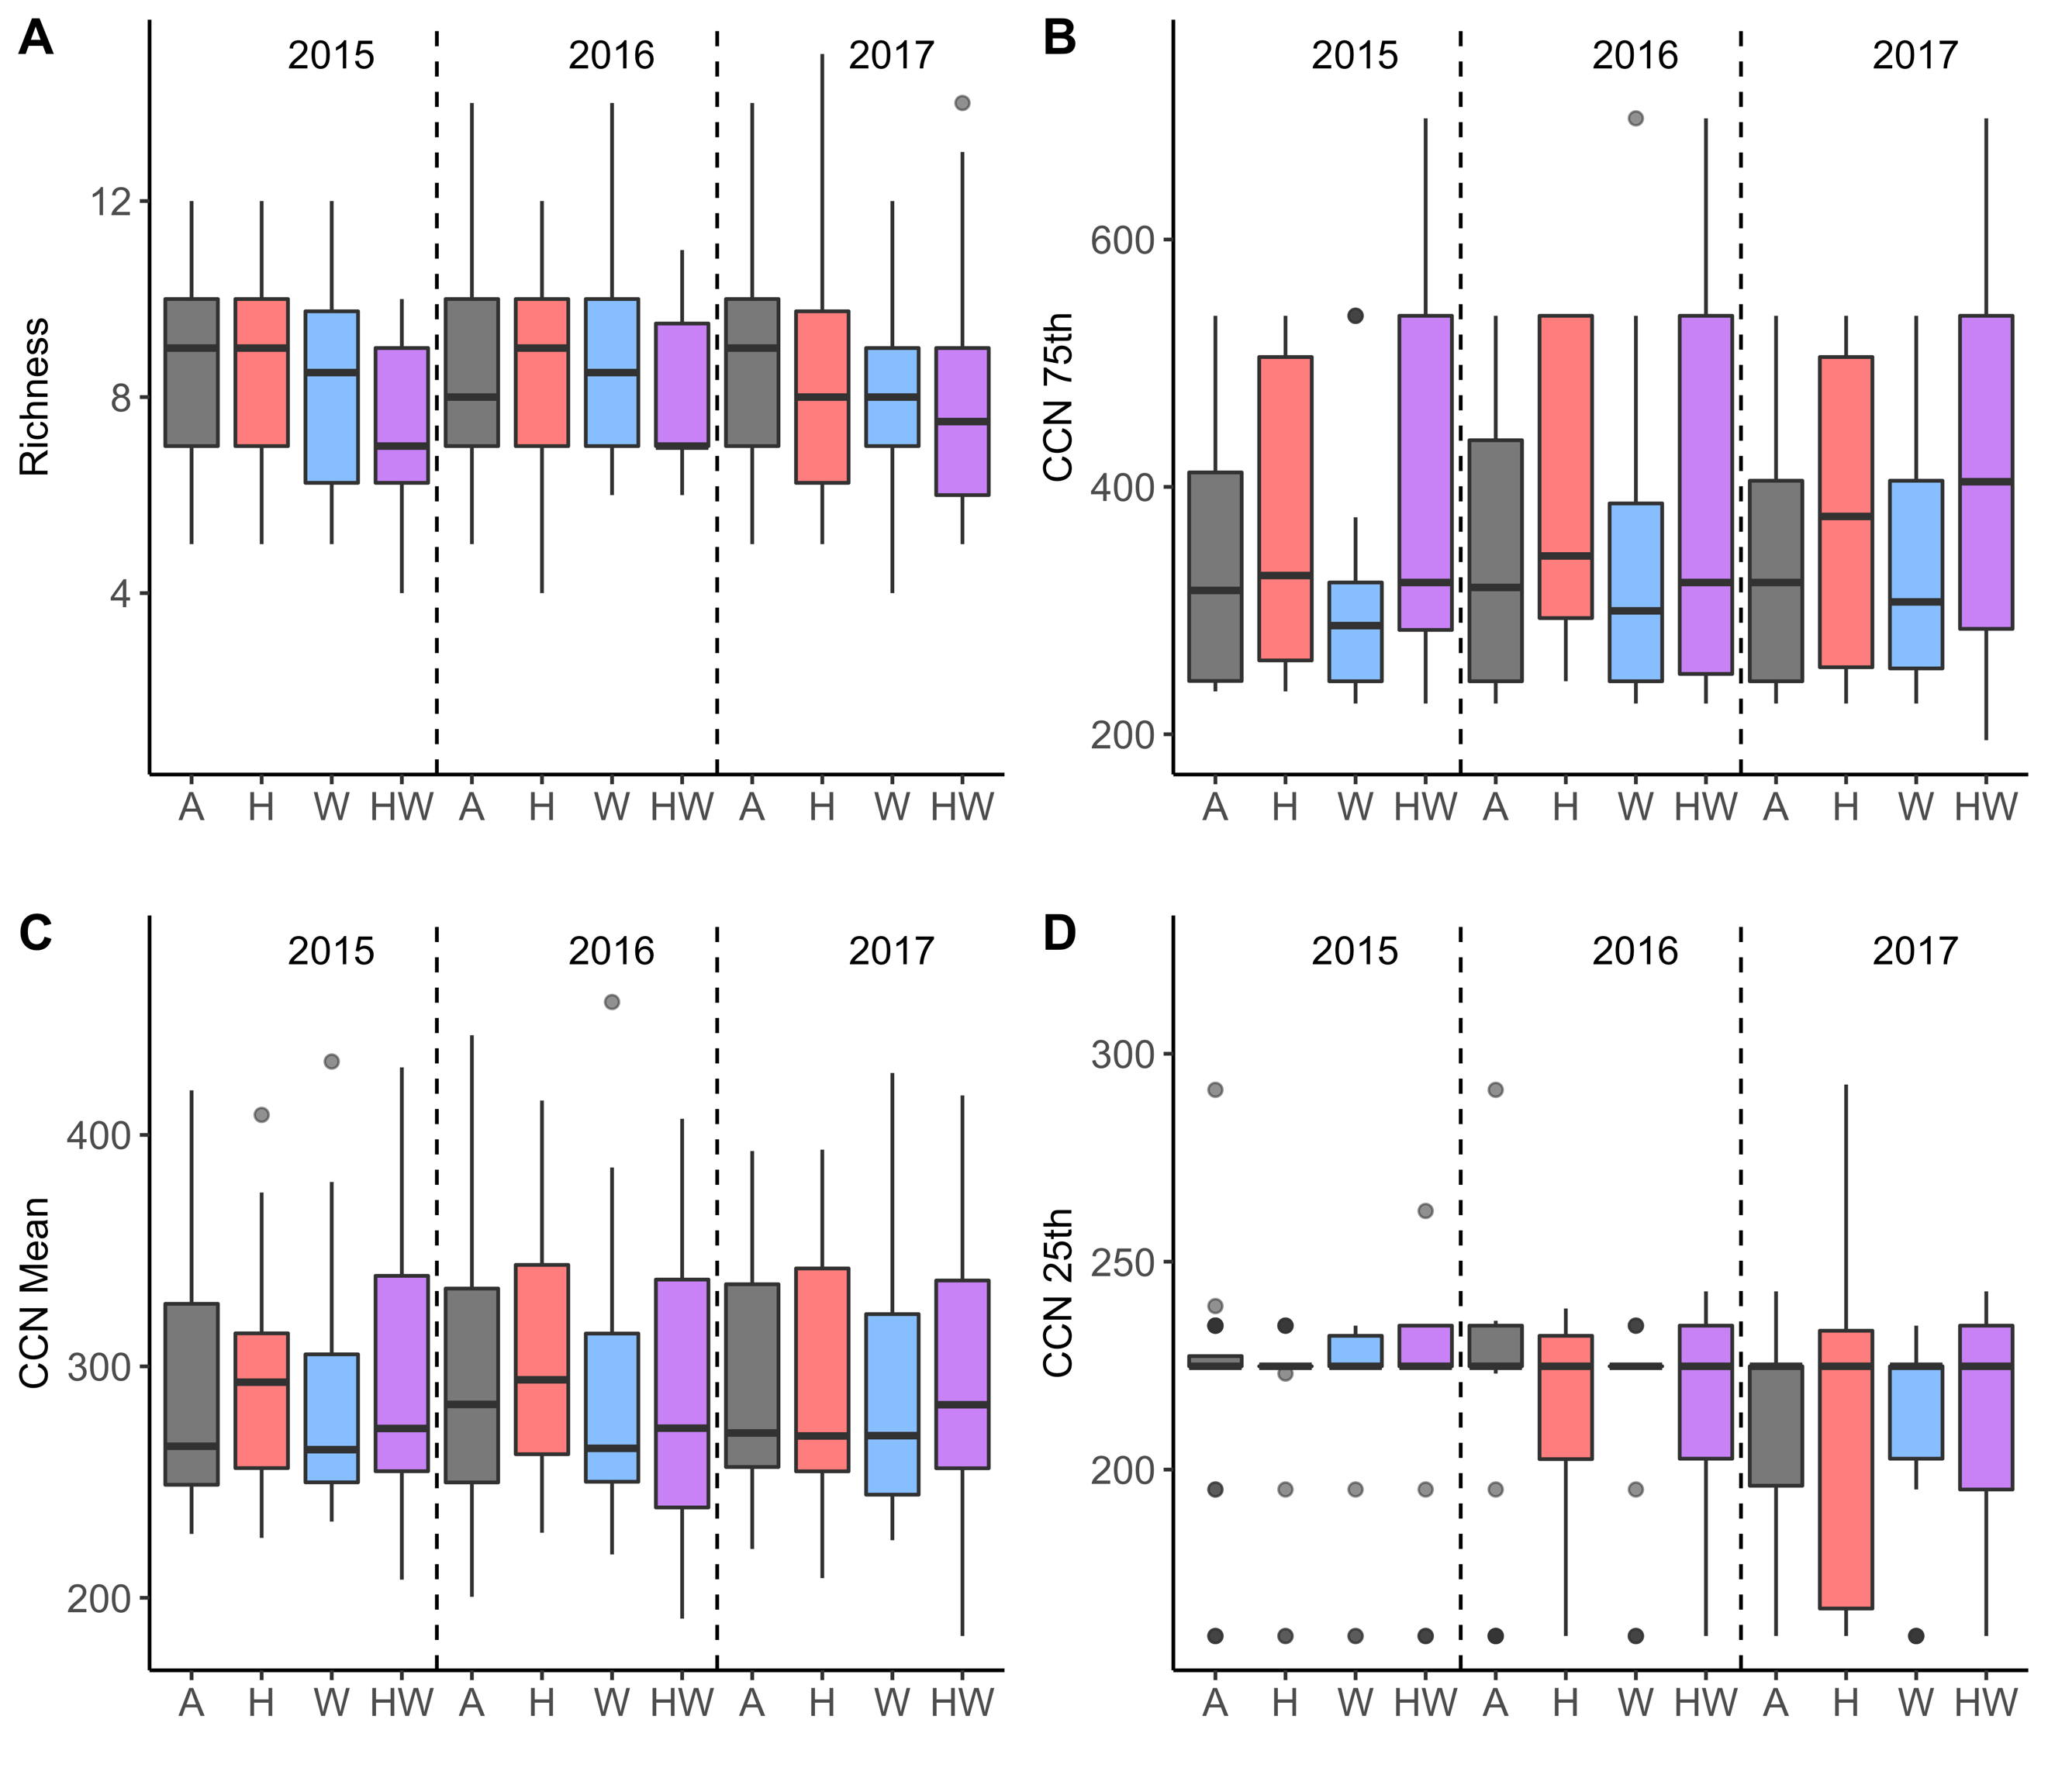


Supplementary Figure 1. Treatment responses for species richness (A), mean community-weighted climate niche (CCN) (B), 75th percentile CCN (C) and 25th percentile CCN (D) across all experimental years (2015 - 2017). Years are separated by dashed lines. Treatment group are designated by color and letter: A = ambient (black), H = heating (red), W = watering (blue), and HW = heating and watering (purple).
